# Supplementary material
Source: PubMed Central journal article supplement (PMC4398576)
Supplement: NIHMS628348-supplement-supplement_1.pdf [file NIHMS628348-supplement-supplement_1.pdf]

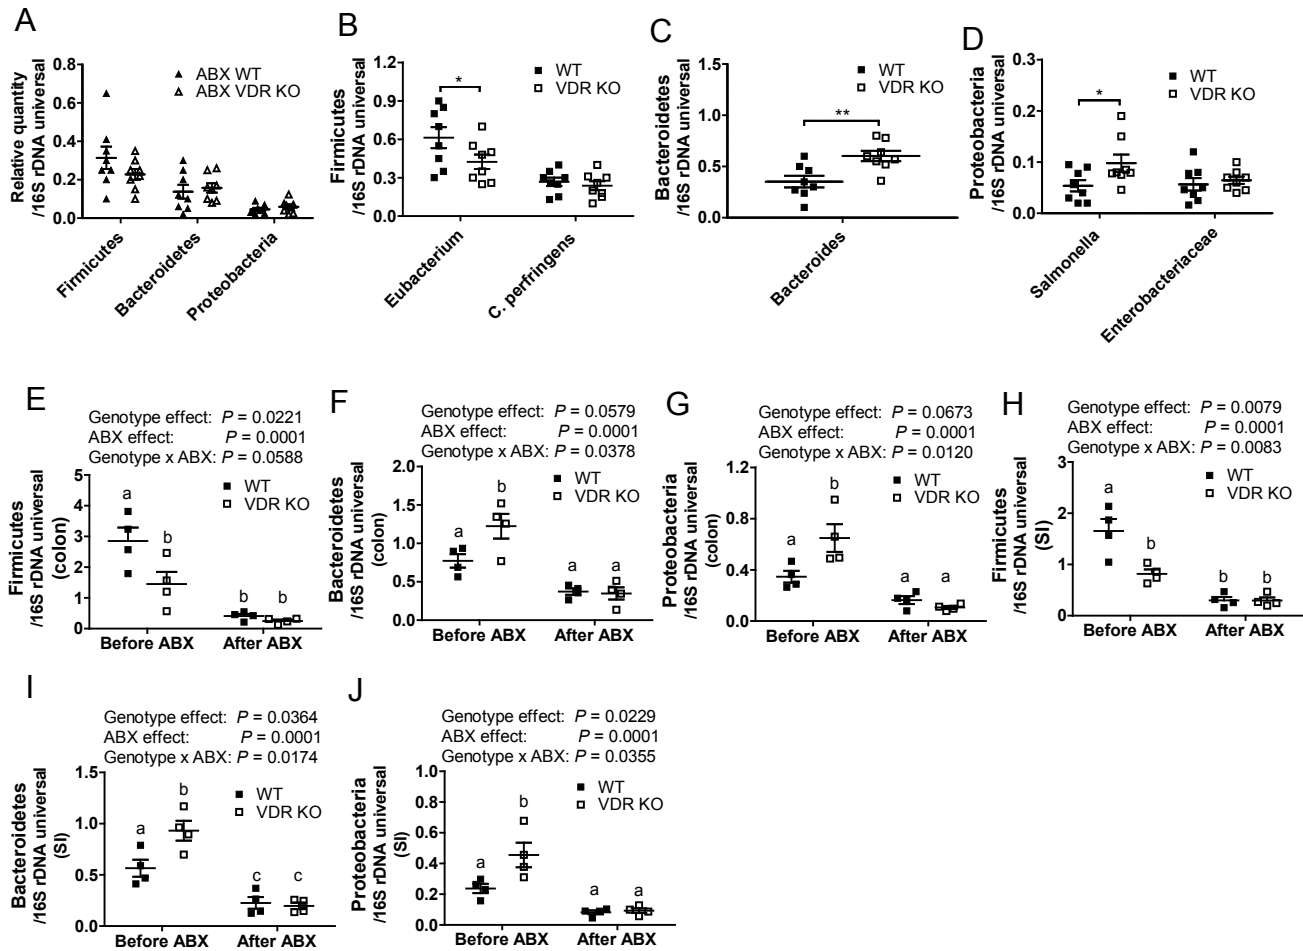

**Supplementary Figure 1. Relative amount of bacteria from different phyla and genera in the feces, colon and SI.** (A) The relative quantity of bacteria in the feces of ABX WT and ABX VDR KO mice. (B-D) The relative quantity of (B) Eubacterium and *Clostridium perfringens* genus, (C) *Bacteroides* genus and (D) *Salmonella* and *Enterobacteriaceae* genus present in the feces of WT and VDR KO mice. (E-G) The relative quantity of bacteria from (E) Firmicutes phylum, (F) Bacteroidetes phylum and (G) Proteobacteria phylum in the colon of untreated or ABX-treated WT and VDR KO mice. (H-J) The relative quantity of bacteria from Firmicutes phylum (H), Bacteroidetes phylum (I) and Proteobacteria phylum (J) in the SI of untreated or ABX-treated WT and VDR KO mice. Data shown is one representative of two independent experiments using  $n=4-8$  mice/group. Values are the mean  $\pm$  SEM. Means without a common letter differ,  $P < 0.05$ . Two-tailed Student's *t*-tests (A-D), Two-way ANOVA with Bonferroni post-hoc tests (E-J), \* $P < 0.05$ , \*\* $P < 0.01$ .

Suppl. Figure 2

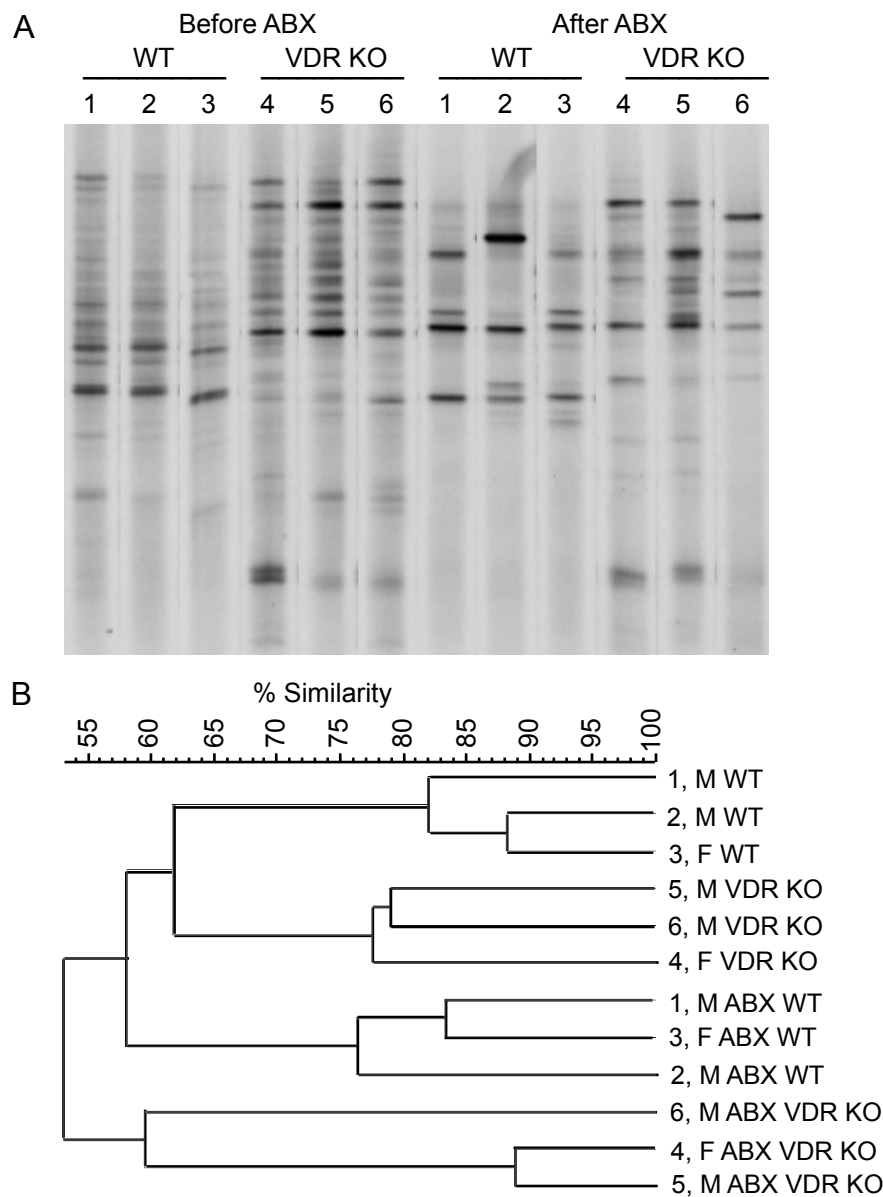

**Alterations in denaturing gradient gel electrophoresis (DGGE) banding patterns of fecal DNA with ABX treatment.** (A) DGGE banding patterns of fecal 16S rDNA of WT and VDR KO mice before ABX treatment. Numbers reflect individual mice. There are fewer bands after ABX treatment suggesting a decrease in bacterial diversity. (B) Cluster analysis of the DGGE banding patterns in A. Mice treated with ABX were more similar to each other than to the samples before ABX treatment. Data shown is one representative experiment of two independent experiments. F: females, M: males.

Suppl. Figure 3

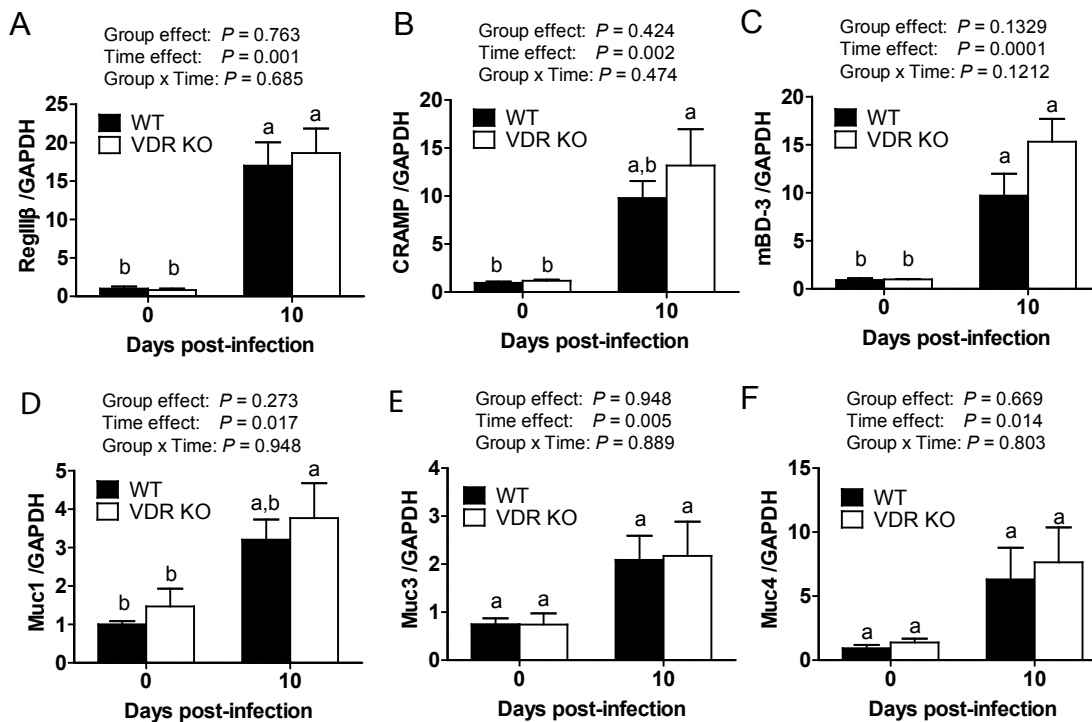

**mRNA expression in the colon of WT and VDR KO mice.** The relative amount of (A) RegIII $\beta$ , (B) CRAMP, (C) mBD-3, (D) Muc 1, (E) Muc 3, (F) Muc 4 in the colon. Values are the mean  $\pm$  SEM of two independent experiments. Two-way ANOVA with Bonferroni post-hoc tests (A-F), values without a common letter differ at the indicated time point,  $P < 0.05$ .

Suppl. Figure 4

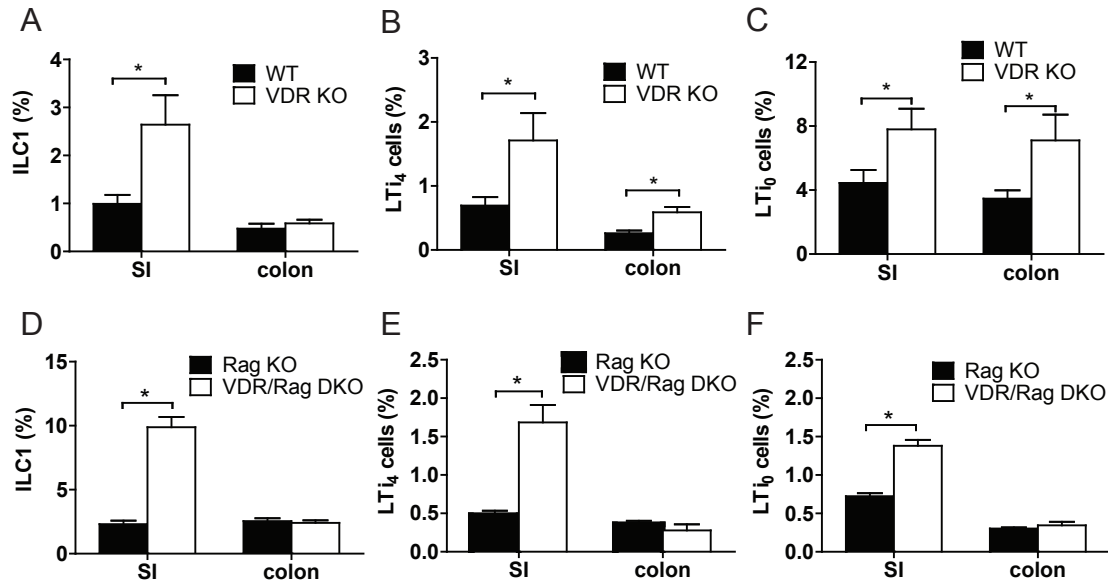

**ILC subsets in the SI and colonic LP of WT, VDR KO, Rag KO and VDR/Rag DKO mice.**  
 The frequencies of (A, D) ILC1 (CD3-ROR $\gamma$ t+NKp46+) cells; (B, E) LT<sub>i4</sub> (CD3-ROR $\gamma$ t+NKp46-CD4+) cells, (C, F) LT<sub>i0</sub> (CD3-ROR $\gamma$ t+NKp46-CD4-) cells in the SI and colonic LP of (A-C) WT and VDR KO and (D-F) Rag KO and VDR/Rag DKO mice. Data shown is one representative of two independent experiments using n=6-8 mice/group. Two-tailed Student's t tests (A-F), \* $P$ <0.05.

Suppl. Figure 5

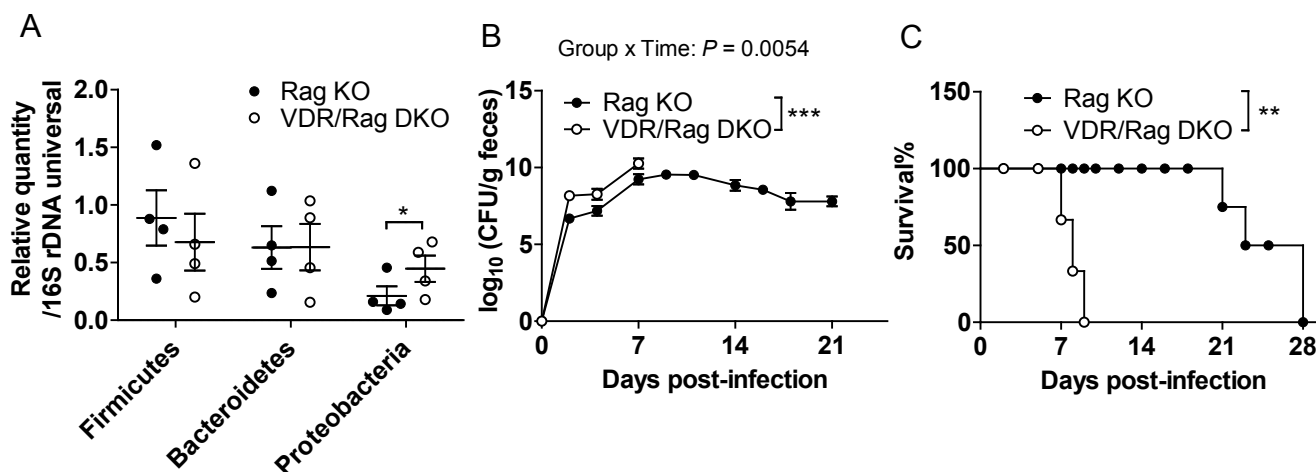

**VDR/Rag DKO mice are more susceptible to *C. rodentium* than Rag KO mice.** (A) The relative quantities of bacteria from Firmicutes, Bacteroidetes and Proteobacteria phyla in the feces. (B) *C. rodentium* shedding in the feces. (C) Survival kinetics following infection with *C. rodentium*. Data shown is one representative of two independent experiments using  $n=4-10$  mice/group. Two-tailed Student's *t* tests (A), Two-way ANOVA with Bonferroni post-hoc tests (B), log-rank test (C), \* $P < 0.05$ , \*\* $P < 0.01$ , \*\*\* $P < 0.001$ .

Suppl. Figure 6

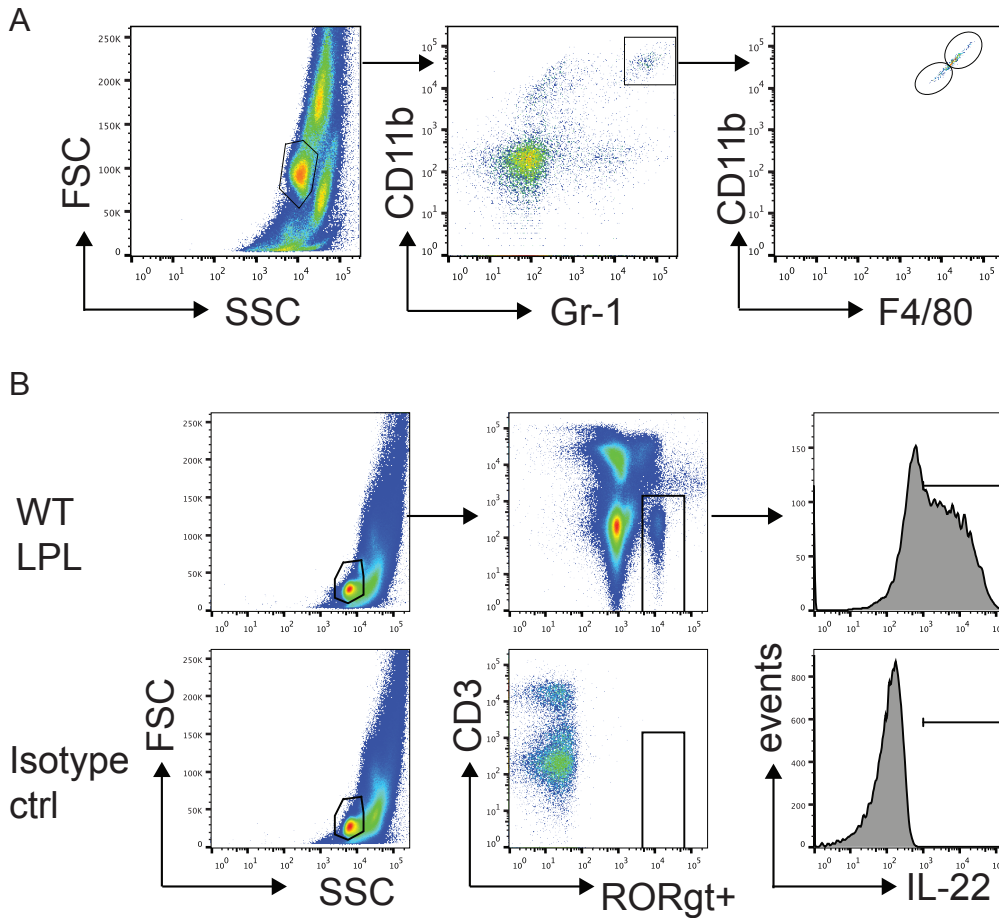

**FACS gating strategy for Figure 1.** (A) Lymphocytes were identified and the CD11b<sup>+</sup> and Gr-1<sup>high</sup> cells were separated into inflammatory monocytes (F480 high) and neutrophils (F480 low). (B) Lymphocytes in the LP were identified and the CD3-RORgt<sup>+</sup> were used to identify ILCs (middle panel). IL-22 secreting ILCs are shown in the right hand panel. The bottom panel shows the isotype control staining for RORgt (middle) and IL-22 (right).

Supplementary Table 1

| Gene                             | Primer sequence (5' to 3')                                                                       |
|----------------------------------|--------------------------------------------------------------------------------------------------|
| <b>Bacterial quantification</b>  |                                                                                                  |
| Firmicutes                       | forward: TGAAACTYAAAGGAATTGACG<br>reverse: ACCATGCACCCACTGTC                                     |
| Bacteroidetes                    | forward: CRAACAGGATTAGATACCCT<br>reverse: GGTAAGGTTCCCTCGCGTAT                                   |
| γ-Proteobacteria                 | forward: TCGTCAGCTCGTGTGYGA<br>reverse: CGTAAGGGCCATGATG                                         |
| Eubacterium                      | forward: ACTCCTACGGGAGGCAGC<br>reverse: GCTTCTTAGTCAGGTACCGTCAT                                  |
| Clostridium perfringens          | forward: CGCATAACGTTGAAAGATGG<br>reverse: CCTTGGTAGGCCGTTACCC                                    |
| Bacteroides                      | forward: GGTTCTGAGAGGAGGTCCC<br>reverse: GCTGCCTCCCGTAGGAGT                                      |
| Salmonella                       | forward: TGTTGTGGTTAATAACCGCA<br>reverse: GACTACCAGGGTATCTAATCC                                  |
| Enterobacteriaceae               | forward: GTGCCAGCMGCCGCGGTAA<br>reverse: GCCTCAAGGGCACAACTCCAAG                                  |
| 16S rDNA universal<br>(GC-clamp) | forward: CGCCCGCCGCGCGCGGGCGGGGCGGGGGCA<br>CGGGGGGCTACGGGAGGCAGCAG<br>reverse: ATTACCGCGGCTGCTGG |
| <b>Quantitative PCR</b>          |                                                                                                  |
| IFN-γ                            | forward: TGCATCTTGGCTTTGCAGCTCTTCCTCATGGC<br>reverse: TGGACCTGTGGGTTGTTGACCTCAAACCTTGGC          |
| IL-17A                           | forward: CAGGGAGAGCTTCATCTGTGT<br>reverse: GCTGAGCTTTGAGGGATGAT                                  |
| IL-6                             | forward: GCTACCAAACCTGGATATAATCAGGT<br>reverse: CCAGGTAGCTATGGTACTCCAGAA                         |
| RegIIIγ                          | forward: TTCCTGTCCTCCATGATCAAAA<br>reverse: CATCCACCTCTGTTGGGTTCA                                |
| RegIIIβ                          | forward: ATTGCGAGGAAGCTTATGGGAATGGAGTAACAAT<br>reverse: CTATAGGGATCCGCAGACATAGGGCAACTTCA         |
| mucin 1 (Muc1)                   | forward: TGCCAGTGCCGCCGAAAGAG<br>reverse: GCCGAAACCTCCTCATAGGGGC                                 |
| mucin 2 (Muc2)                   | forward: GCTGACGAGTGGTTGGTGAATG<br>reverse: GATGAGGTGGCAGACAGGAGAC                               |
| mucin 3 (Muc3)                   | forward: CGTGGTCAACTGCCGAGAATGG<br>reverse: CGGCTCTATCTCTACGCTCTCC                               |
| mucin 4 (Muc4)                   | forward: CAGCAGCCAGTGGGGACAG<br>reverse: CTCAGACACAGCCAGGGAACCTC                                 |
| Angiogenin-4 (Ang-4)             | forward: CTCTGGCTCAGAATGAAAGGTACGA<br>reverse: GAAATCTTTAAAGGCTCGGTACCC                          |
| β-defensin 3 (mBD-3)             | forward: GCTAGGGAGCACTTGTTTGC<br>reverse: TTGTTTGAGGAAAGGAGGCA                                   |
| CRAMP                            | forward: CTTCAACCAGCAGTCCCTAGACA<br>reverse: TCCAGGTCCAGGAGACGGTA                                |
| GAPDH                            | forward: TGAAGGTCCGGTGTGAACGGATTTGGC<br>reverse: CATGTAGGCCATGAGGTCCACCAC                        |
